# Supplementary material for: Mitochondrial DNA and Alzheimer's Disease: A First Case-control Study of the Tunisian Population
Source: Research Square preprint supplement (doi:10.21203/rs.3.rs-1036952/v1), 2021-11-02
Supplement: Supplementary file 1 [file 5214552b4b015333580191bd.xlsx]

## Sheet: Feuil1
note : a list of 159 mitochondrial SNPs genotyped using the Axiom 815K Spanish Biobank Array (Thermo Fisher).
nucleotide position	Locus	Nucleotide Change
73	D-loop (HVSII)	A>G
150	D-loop (HVSII)	C>T
228	D-loop (HVSII)	A>G
263	D-loop (HVSII)	A>G
295	D-loop (HVSII)	T>C
497	D-loop (HVSIII)	T>C
709	rRNA 12S	A>G
750	rRNA 12S	A>G
769	rRNA 12S	G>A
980	rRNA 12S	C>T
1018	rRNA 12S	A>G
1243	rRNA 12S	C>T
1438	rRNA 12S	A>G
1719	rRNA 16S	A>G
1721	rRNA 16S	T>C
2218	rRNA 16S	T>C
2416	rRNA 16S	C>T
2483	rRNA 16S	C>T
2706	rRNA 16S	A>G
2758	rRNA 16S	A>G
2885	rRNA 16S	C>T
3010	rRNA 16S	A>G
3197	rRNA 16S	C>T
3308	rRNA 16S	G>T
3348	NADH dehydrogenase subunit 1	G>A
3480	NADH dehydrogenase subunit 1	G>A
3531	NADH dehydrogenase subunit 1	A>G
3594	NADH dehydrogenase subunit 1	T>C
3666	NADH dehydrogenase subunit 1	A>G
3697	NADH dehydrogenase subunit 1	A>G
3834	NADH dehydrogenase subunit 1	A>G
3866	NADH dehydrogenase subunit 1	C>T
3915	NADH dehydrogenase subunit 1	A>G
3918	NADH dehydrogenase subunit 1	A>G
4024	NADH dehydrogenase subunit 1	A>G
4093	NADH dehydrogenase subunit 1	G>A
4104	NADH dehydrogenase subunit 1	G>A
4216	NADH dehydrogenase subunit 1	C>T
4310	tRNA Ile	G>A
4529	NADH dehydrogenase subunit 2	T>A
4561	NADH dehydrogenase subunit 2	C>T
4580	NADH dehydrogenase subunit 2	A>G
4769	NADH dehydrogenase subunit 2	A>G
4820	NADH dehydrogenase subunit 2	A>G
4917	NADH dehydrogenase subunit 2	G>A
5004	NADH dehydrogenase subunit 2	C>T
5046	NADH dehydrogenase subunit 2	A>G
5147	NADH dehydrogenase subunit 2	A>G
5360	NADH dehydrogenase subunit 2	T>C
5442	NADH dehydrogenase subunit 2	C>T
5633	tRNA Ala	T>C
5656	Non-coding 4	G>A
5773	The origin of light-strand replication	A>G
5951	Cytochrome c oxidase subunit 1	G>A
5999	Cytochrome c oxidase subunit 1	C>T
6047	Cytochrome c oxidase subunit 1	G>A
6185	Cytochrome c oxidase subunit 1	C>T
6221	Cytochrome c oxidase subunit 1	C>T
6253	Cytochrome c oxidase subunit 1	C>T
6371	Cytochrome c oxidase subunit 1	T>C
6734	Cytochrome c oxidase subunit 1	A>G
6776	Cytochrome c oxidase subunit 1	C>T
7028	Cytochrome c oxidase subunit 1	C>T
7055	Cytochrome c oxidase subunit 1	G>A
7175	Cytochrome c oxidase subunit 1	C>T
7476	tRNA Ser(1)	T>C
7657	Cytochrome c oxidase subunit 2	C>T
7768	Cytochrome c oxidase subunit 2	G>A
8448	Cytochrome c oxidase subunit 2	C>T
8655	ATP synthase F0 subunit 6	T>C
8697	ATP synthase F0 subunit 6	A>G
8869	ATP synthase F0 subunit 6	G>A
8994	ATP synthase F0 subunit 6	A>G
9042	ATP synthase F0 subunit 6	T>C
9055	ATP synthase F0 subunit 6	A>G
9072	ATP synthase F0 subunit 6	G>A
9123	ATP synthase F0 subunit 6	A>G
9221	Cytochrome c oxidase subunit 3	G>A
9377	Cytochrome c oxidase subunit 3	G>A
9698	Cytochrome c oxidase subunit 3	C>T
9716	Cytochrome c oxidase subunit 3	C>T
9899	Cytochrome c oxidase subunit 3	C>T
9950	Cytochrome c oxidase subunit 3	C>T
10044	Cytochrome c oxidase subunit 3	G>A
10142	Cytochrome c oxidase subunit 3	T>C
10217	NADH dehydrogenase subunit 3	A>G
10238	NADH dehydrogenase subunit 3	C>T
10398	NADH dehydrogenase subunit 3	G>A
10400	NADH dehydrogenase subunit 3	T>C
10463	tRNA Arg	C>T
10550	NADH dehydrogenase subunit 4L	G>A
10688	NADH dehydrogenase subunit 4L	A>G
10810	NADH dehydrogenase subunit 4	C>T
10819	NADH dehydrogenase subunit 4	G>A
10873	NADH dehydrogenase subunit 4	C>T
10915	NADH dehydrogenase subunit 4	C>T
11251	NADH dehydrogenase subunit 4	G>A
11299	NADH dehydrogenase subunit 4	C>T
11332	NADH dehydrogenase subunit 4	T>C
11377	NADH dehydrogenase subunit 4	A>G
11467	NADH dehydrogenase subunit 4	G>A
11674	NADH dehydrogenase subunit 4	T>C
11812	NADH dehydrogenase subunit 4	G>A
11914	NADH dehydrogenase subunit 4	A>G
11947	NADH dehydrogenase subunit 4	G>A
12372	NADH dehydrogenase subunit 5	A>G
12397	NADH dehydrogenase subunit 5	G>A
12406	NADH dehydrogenase subunit 5	A>G
12501	NADH dehydrogenase subunit 5	A>G
12612	NADH dehydrogenase subunit 5	G>A
12633	NADH dehydrogenase subunit 5	A>C
12705	NADH dehydrogenase subunit 5	T>C
12810	NADH dehydrogenase subunit 5	G>A
12879	NADH dehydrogenase subunit 5	C>T
12950	NADH dehydrogenase subunit 5	G>A
13020	NADH dehydrogenase subunit 5	C>T
13104	NADH dehydrogenase subunit 5	G>A
13105	NADH dehydrogenase subunit 5	G>A
13117	NADH dehydrogenase subunit 5	G>A
13500	NADH dehydrogenase subunit 5	C>T
13506	NADH dehydrogenase subunit 5	T>C
13617	NADH dehydrogenase subunit 5	C>T
13650	NADH dehydrogenase subunit 5	T>C
13708	NADH dehydrogenase subunit 5	A>G
13759	NADH dehydrogenase subunit 5	A>G
13789	NADH dehydrogenase subunit 5	C>T
13879	NADH dehydrogenase subunit 5	C>T
13966	NADH dehydrogenase subunit 5	G>A
14016	NADH dehydrogenase subunit 5	A>G
14070	NADH dehydrogenase subunit 5	G>A
14133	NADH dehydrogenase subunit 5	G>A
14167	NADH dehydrogenase subunit 6	T>C
14484	NADH dehydrogenase subunit 6	C>T
14582	NADH dehydrogenase subunit 6	G>A
14620	NADH dehydrogenase subunit 6	T>C
14798	Cytochrome b	C>T
14869	Cytochrome b	A>G
14872	Cytochrome b	T>C
14905	Cytochrome b	A>G
15043	Cytochrome b	A>G
15148	Cytochrome b	A>G
15244	Cytochrome b	G>A
15257	Cytochrome b	A>G
15301	Cytochrome b	A>G
15452	Cytochrome b	A>C
15454	Cytochrome b	C>T
15693	Cytochrome b	C>T
15784	Cytochrome b	C>T
15812	Cytochrome b	A>G
15884	Cytochrome b	A>G
15928	tRNA Thr	A>G
15930	tRNA Thr	A>G
16145	D-loop	A>G
16153	D-loop	A>G
16193	D-loop	T>C
16270	D-loop	T>C
16356	D-loop	C>T
16362	D-loop	C>T
16391	D-loop	A>G

## Sheet: Feuil3
26	AX-84774093	0	73	A	G
26	AX-84734089	0	150	T	C
26	AX-37116885	0	228	A	G
26	AX-11418928	0	263	A	G
26	AX-94364295	0	295	T	C
26	AX-90082858	0	497	T	C
26	AX-11418929	0	709	A	G
26	AX-94380972	0	750	A	G
26	AX-11418931	0	769	A	G
26	AX-92016094	0	980	C	T
26	AX-90082956	0	1018	A	G
26	AX-11414532	0	1243	C	T
26	AX-88792731	0	1719	A	G
26	AX-90082833	0	1721	T	C
26	AX-90082879	0	2218	T	C
26	AX-11414536	0	2416	C	T
26	AX-37116887	0	2483	C	T
26	AX-11419081	0	2706	A	G
26	AX-37116891	0	2758	A	G
26	AX-11419083	0	2885	C	T
26	AX-11488015	0	3010	A	G
26	AX-90053921	0	3197	C	T
26	AX-90054036	0	3308	G	T
26	AX-11495478	0	3348	G	A
26	AX-90053922	0	3480	G	A
26	AX-90082902	0	3531	A	G
26	AX-90082925	0	3594	T	C
26	AX-90082808	0	3666	A	G
26	AX-90054009	0	3697	A	G
26	AX-94364271	0	3834	A	G
26	AX-90082866	0	3866	C	T
26	AX-94380976	0	3918	A	G
26	AX-37116899	0	4024	G	A
26	AX-90054069	0	4093	G	A
26	AX-90082907	0	4104	G	A
26	AX-90082868	0	4216	C	T
26	AX-94364274	0	4310	G	A
26	AX-94364275	0	4529	T	A
26	AX-37116901	0	4561	C	T
26	AX-37116903	0	4580	A	G
26	AX-37116907	0	4769	A	G
26	AX-94380978	0	4820	A	G
26	AX-90082811	0	4917	G	A
26	AX-90053927	0	5004	C	T
26	AX-37116911	0	5046	A	G
26	AX-90054077	0	5147	A	G
26	AX-94381025	0	5360	T	C
26	AX-90082813	0	5442	C	T
26	AX-90053976	0	5633	T	C
26	AX-37116917	0	5656	G	A
26	AX-94364233	0	5773	A	G
26	AX-37116919	0	5951	G	A
26	AX-94364262	0	5999	C	T
26	AX-94381012	0	6047	G	A
26	AX-90082855	0	6185	C	T
26	AX-94380983	0	6221	C	T
26	AX-94381026	0	6253	C	T
26	AX-90054041	0	6371	T	C
26	AX-90082794	0	6734	A	G
26	AX-90053910	0	6776	C	T
26	AX-11360020	0	7028	C	T
26	AX-90082796	0	7055	G	A
26	AX-37116931	0	7175	C	T
26	AX-90082837	0	7476	T	C
26	AX-90082959	0	7657	C	T
26	AX-90082815	0	7768	G	A
26	AX-94364285	0	8448	C	T
26	AX-94364286	0	8655	T	C
26	AX-90054031	0	8697	A	G
26	AX-37116941	0	8869	G	A
26	AX-90082933	0	8994	A	G
26	AX-11431996	0	9042	T	C
26	AX-90053984	0	9055	A	G
26	AX-37116943	0	9072	G	A
26	AX-94381039	0	9123	A	G
26	AX-90054072	0	9221	G	A
26	AX-94364236	0	9377	G	A
26	AX-90082817	0	9698	C	T
26	AX-11496485	0	9716	C	T
26	AX-94364238	0	9899	C	T
26	AX-94380988	0	9950	C	T
26	AX-37116825	0	10044	G	A
26	AX-94381036	0	10142	T	C
26	AX-90082818	0	10238	C	T
26	AX-90084147	0	10398	G	A
26	AX-90082853	0	10400	T	C
26	AX-90053935	0	10463	C	T
26	AX-37116835	0	10550	G	A
26	AX-11418906	0	10688	A	G
26	AX-90053962	0	10810	C	T
26	AX-90082862	0	10819	G	A
26	AX-94364243	0	10873	C	T
26	AX-88749688	0	10915	C	T
26	AX-11487442	0	11251	G	A
26	AX-90082937	0	11299	C	T
26	AX-94364299	0	11332	T	C
26	AX-90053936	0	11377	A	G
26	AX-90082822	0	11467	G	A
26	AX-90054014	0	11674	T	C
26	AX-37116851	0	11812	G	A
26	AX-37116853	0	11914	A	G
26	AX-94364281	0	11947	G	A
26	AX-11418917	0	12372	A	G
26	AX-90082865	0	12397	G	A
26	AX-90082870	0	12406	A	G
26	AX-90082848	0	12501	A	G
26	AX-11414557	0	12612	G	A
26	AX-90054030	0	12633	A	C
26	AX-90084135	0	12705	T	C
26	AX-90082944	0	12810	G	A
26	AX-90082896	0	12879	C	T
26	AX-90054000	0	12950	G	A
26	AX-94364282	0	13020	C	T
26	AX-82947913	0	13104	G	A
26	AX-37116861	0	13105	G	A
26	AX-90054046	0	13117	G	A
26	AX-90054027	0	13500	C	T
26	AX-90082900	0	13506	T	C
26	AX-90054010	0	13617	C	T
26	AX-94380997	0	13650	T	C
26	AX-11414562	0	13708	A	G
26	AX-94381013	0	13759	A	G
26	AX-11414563	0	13789	C	T
26	AX-90082884	0	13879	C	T
26	AX-11496703	0	13966	G	A
26	AX-90082938	0	14016	A	G
26	AX-94381033	0	14070	G	A
26	AX-90082838	0	14133	G	A
26	AX-90082930	0	14167	T	C
26	AX-90082901	0	14484	C	T
26	AX-94364251	0	14582	G	A
26	AX-94364291	0	14620	T	C
26	AX-11414506	0	14798	C	T
26	AX-94381041	0	14869	A	G
26	AX-94381014	0	14872	T	C
26	AX-11414507	0	14905	A	G
26	AX-90082828	0	15043	A	G
26	AX-94381042	0	15148	A	G
26	AX-90054060	0	15244	G	A
26	AX-90082829	0	15257	A	G
26	AX-94364252	0	15301	A	G
26	AX-37116873	0	15452	A	C
26	AX-94381049	0	15454	C	T
26	AX-90082874	0	15693	C	T
26	AX-94381003	0	15784	C	T
26	AX-90053997	0	15812	A	G
26	AX-90053966	0	15884	A	G
26	AX-90082831	0	15928	A	G
26	AX-94381005	0	15930	A	G
26	AX-94381007	0	16145	A	G
26	AX-11418924	0	16153	A	G
26	AX-90082887	0	16193	T	C
26	AX-94381009	0	16270	T	C
26	AX-90053957	0	16356	C	T
26	AX-90053958	0	16362	C	T
